# Supplementary material
Source: PubMed Central journal article supplement (PMC4402272)
Supplement: NIHMS669010-supplement-1.pdf [file NIHMS669010-supplement-1.pdf]

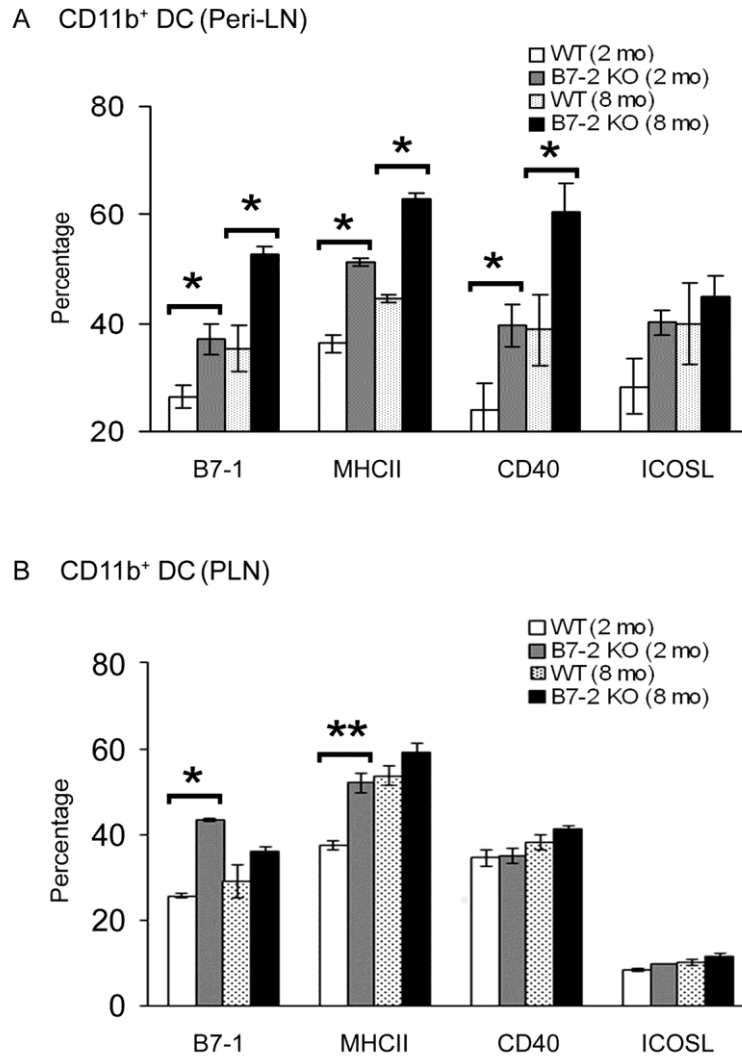

**Supplemental Figure 1.** Immunophenotypic analysis of CD11c<sup>+</sup>CD11b<sup>+</sup> DCs from Peri-LN and PLN of B7-2 KO vs WT NOD mice. Cells were gated based on CD11c, CD11b staining and analyzed for MHCII, CD40, B7-1 and ICOSL expression. **A.** Data from Peri-LN. Comparing B7-2 KO vs WT NOD mice, \* $p < 0.001$  for B7-1, MHCII, and CD40 at 2 mo & 8 mo. **B.** Data from PLN. Comparing B7-2 KO vs WT NOD mice, \* $p < 0.001$  for B7-1 at 2 mo, and \*\* $p < 0.003$  MHCII at 2 mo. Values from A & B represent mean  $\pm$  SEM ( $n = 3$ ).

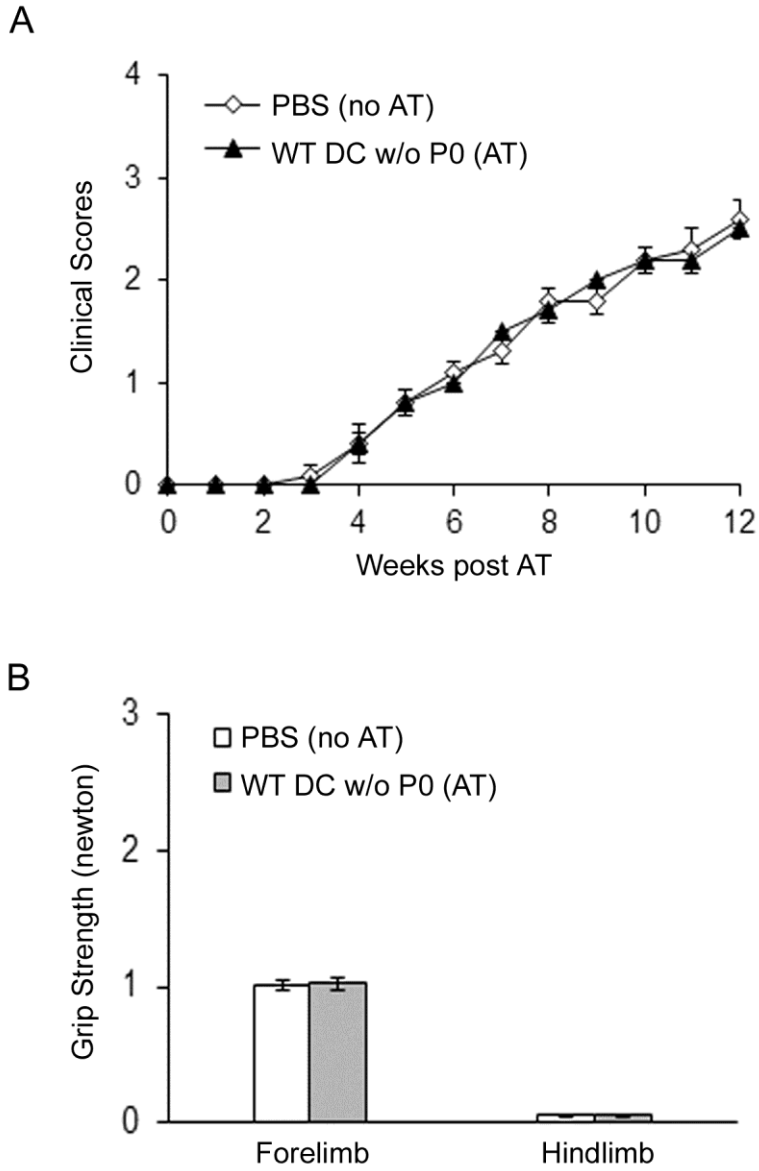

**Supplemental Figure 2.** Failure of WT DCs unpulsed with Ag to induce tolerance to the development of SAP. A. Mean clinical scores; B. Grip strength measurements. Values from A & B represent mean  $\pm$  SEM (n = 5).

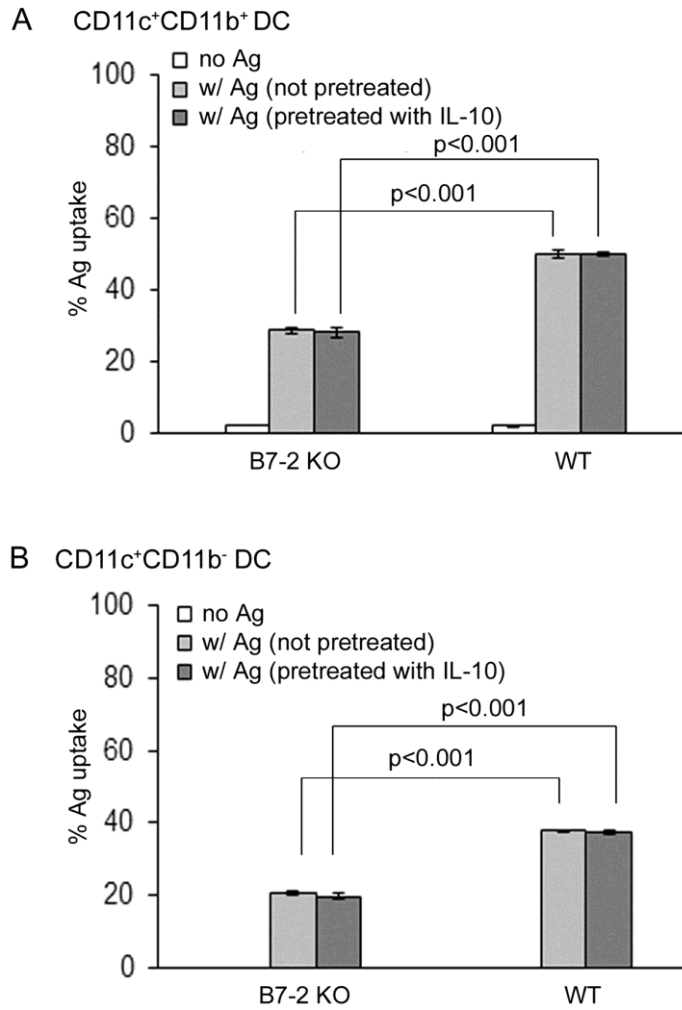

**Supplemental Figure 3.** IL-10 preconditioning had no effect on antigen capture by DCs *in vitro*. Splenocytes ( $1 \times 10^6$ ) from 6 wk old WT or B7-2 KO NOD mice were seeded into 96-well plates, and incubated with 20  $\mu\text{g/ml}$  Alexa546-labelled P0-ECD in 37 °C for three hours. This was followed by staining with APC-conjugated Ab  $\alpha$  CD11c and FITC-conjugated Ab  $\alpha$  CD11b. A. Antigen capture in CD11c<sup>+</sup>CD11b<sup>+</sup> DCs. B. Antigen capture in CD11c<sup>+</sup>CD11b<sup>-</sup> DCs. Ag capture was decreased in B7-2 KO DCs compared to WT NOD DCs ( $p < 0.001$ ) but IL-10 pretreatment for 3 days did not alter %Ag uptake. Values represent mean percentage  $\pm$  SEM ( $n = 3$ ).

Table 1. List of primers used in real-time RT-PCR studies

| Gene          | Sense                      | antisense                    |
|---------------|----------------------------|------------------------------|
| IL-12p40      | 5'-TGTCCTCAGAAGCTAACCA-3'  | 5'-CAGTCCACCTCTACAACATAAA-3' |
| TNF- $\alpha$ | 5'-CTGGGACAGTGACCTGGACT-3' | 5'-GCACCTCAGGGAAGAGTCTG-3'   |
| IL-10         | 5'-TGAATTCCCTGGGTGAGA-3'   | 5'-CCACTGCCTTGCTCTTATT-3'    |
| IL-6          | 5'-CACAAGTCGGAGGCTTAAT-3'  | 5'-GTGCATCATCGTTGTTTCATAC-3' |
| TGF- $\beta$  | 5'-ACCCTGGTGGTATACTGAGA-3' | 5'-CCCAAGGAAAGGTAGGTGATAG-3' |
| GAPDH         | 5'-TTCACCACCATGGAGAAGGC-3' | 5'-GGCATGGACTGTGGTCATGA-3'   |
